# Supplementary material for: One day you'll wake up and won't have to go to work: The impact of changes in time use on mental health following retirement
Source: PLoS One. 2018 Jun 28;13(6):e0199605. doi: 10.1371/journal.pone.0199605 (PMC6023158; doi:10.1371/journal.pone.0199605)
Supplement: S1 File — The complete dataset on which this analysis was based. (XLSX) [file pone.0199605.s001.xlsx]

## Sheet: Sheet1
ID	sex	base_age	base_income	base_role.physical	base_sleep	base_chores	base_PA	base_quiettime	base_screen	base_selfcare	base_sociocultural	base_transport	base_work	base_dass_total	base_dass_depression	base_dass_anxiety	base_dass_stress	base_lifesatisfaction	base_rosenberg	base_swemwbs	post_income	post_role.physical	post_sleep	post_chores	post_PA	post_quiettime	post_screen	post_selfcare	post_sociocultural	post_transport	post_work	post_dass_total	post_dass_depression	post_dass_anxiety	post_dass_stress	post_lifesatisfaction	post_rosenberg	post_swemwbs
1001	1	60.5589	62	100	405	102.5	0	16.25	293.75	115	56.25	101.25	350	2	1	0	1	6	21	21.54	17.5	100	379.29	143.81	45	91.9	376.19	107.38	125	95.95	75.48	0	0	0	0	9	29	27.03
1002	1	55.337	17.5	25	377.14	164.29	0	50.24	193.81	225.48	55.95	215.95	157.15	35	14	8	13	6	16	15.84	17.5	25	436.67	122.14	13.1	157.86	260	175.24	70.95	110	94.05	35	12	11	12	3	16	15.84
1004	1	58.074	148	0	494.52	47.62	0	20.24	142.62	213.81	72.62	270	178.57	16	5	3	8	7	19	24.11	116	0	502.62	247.86	17.86	4.76	155.96	205	80.71	97.38	127.85	4	1	0	3	8	23	25.03
1005	1	57.3534	148	100	463.57	175.71	19.05	95.24	77.14	145.95	97.14	89.29	276.9	11	2	5	4	6	17	22.35	148	100	518.33	126.19	9.52	95.71	64.28	90.71	181.19	94.05	260	7	0	4	3	8	20	23.21
1006	2	61.5671	28.5	75	458.81	143.33	0	47.14	219.05	134.29	33.33	153.81	250.23	8	3	0	5	7	24	26.02	33.5	75	451.19	199.52	0	117.38	231.91	96.9	137.86	134.76	70.47	7	1	0	6	2	23	27.03
1007	2	60.6521	148	100	489.05	92.38	10.71	39.76	41.66	142.38	50	197.86	376.19	2	0	0	2	9	30	28.13	148	100	525.95	147.14	0	50.24	198.57	120.48	142.14	95	160.48	0	0	0	0	9	30	29.31
1008	1	61.0877	148	100	548.57	75	0	151.43	215	114.76	127.86	81.19	126.19	0	0	0	0	8	26	25.03	148	100	529.29	229.76	38.1	70.95	276.19	75.24	54.29	104.76	61.42	3	0	0	3	9	30	32.55
1011	1	59.1726	148	100	537.86	185	45.24	31.19	83.1	123.57	31.67	116.67	285.71	9	3	1	5	8	30	24.11	82.5	100	576.19	254.52	0	27.86	355.48	97.38	21.43	95.24	11.9	1	0	0	1	9	25	30.7
1014	2	65.6438	46	100	410	148.57	0	69.29	151.08	129.29	174.64	113.93	243.21	3	0	0	3	8	27	25.03	28.5	100	365.71	242.5	0	196.79	209.28	117.86	105.71	87.14	115	4	2	1	1	9	29	35
1015	2	69.2521	22.5	100	433.75	155	0	273.75	87.5	106.25	95	156.25	132.5	2	1	0	1	9	27	26.02	28.5	100	473.75	141.25	17.5	316.25	156.25	123.75	101.25	110	0	1	0	0	1	9	25	27.03
1016	2	55.1507	148	100	398.75	162.5	0	133.75	117.5	90	246.25	56.25	235	7	0	3	4	7	28	25.03	116	100	298.75	232.5	23.75	197.5	26.25	132.5	268.75	98.75	161.25	14	5	3	6	4	27	19.25
1017	1	65.5452	148	100	472.14	98.93	31.07	13.57	68.22	121.07	158.57	115.36	361.07	8	1	2	5	9	22	29.31	116	100	502.86	190	91.07	33.93	29.29	148.93	184.28	90.36	169.28	0	0	0	0	9	24	35
1020	1	65.463	28.5	100	411.79	223.57	0	77.86	104.28	109.29	141.79	62.5	308.93	2	0	0	2	9	30	25.03	22.5	100	509.29	342.14	0	7.86	155.71	110.71	118.93	129.64	65.72	3	0	0	3	8	27	25.03
1023	2	60.1397	116	100	406.07	156.43	0	63.21	77.85	159.64	119.64	146.07	311.08	5	0	1	4	8	26	26.02	82.5	100	525.71	128.93	23.21	85.71	90	159.64	198.93	163.57	64.29	2	0	1	1	10	30	32.55
1024	2	61.9178	62	75	439.29	110.71	12.86	44.64	230.72	143.93	151.43	206.07	100.35	9	3	0	6	5	24	22.35	33.5	75	493.21	173.93	40.36	195.71	198.57	116.43	115.71	86.79	19.29	8	2	2	4	9	27	23.21
1026	2	58.8027	148	100	504.05	351.9	0	85.71	61.91	123.1	74.76	100.48	138.09	7	1	2	4	9	27	27.03	82.5	100	509.76	304.05	0	52.38	101.19	152.62	108.81	103.81	107.38	1	0	1	0	9	29	28.13
1027	1	63.5178	116	100	447.62	84.05	7.14	57.86	167.15	84.05	105	101.9	385.23	3	1	0	2	8	30	22.35	116	100	474.29	156.9	0	48.57	210.72	54.52	100	122.38	272.62	3	1	0	2	8	30	26.02
1028	1	60.4877	116	75	506.79	157.5	6.43	82.14	135.72	96.43	88.93	203.57	162.5	6	0	0	6	9	24	26	46	75	483.57	286.07	0	97.14	158.57	79.64	116.07	114.64	104.28	13	4	0	9	7	19	23.21
1029	1	54.3945	148	0	570.48	112.38	0	38.57	78.57	123.81	256.67	119.05	140.48	11	2	3	6	7	24	22.35	82.5	0	540.24	212.38	4.76	116.67	114.29	72.86	178.57	138.81	61.42	6	2	1	3	9	29	27.03
1030	2	64.611	116	100	429.64	210	0	80.36	147.15	122.86	49.29	108.57	292.14	8	1	1	6	9	30	29.31	46	100	445	198.93	0	120	60	183.57	151.07	125.36	156.07	0	0	0	0	10	30	35
1031	1	58.6438	148	100	493.21	130	119.64	21.43	22.15	82.5	293.93	145	132.14	8	4	2	2	8	17	21.54	148	100	526.43	251.43	53.93	68.21	125.35	146.07	59.64	137.86	71.07	8	3	1	4	7	20	21.54
1032	1	71.5205	148	100	362.14	173.93	0	55	122.5	143.93	83.57	130.71	368.21	10	2	1	7	7	20	19.98	116	100	409.64	173.57	8.93	75	70	162.86	164.64	243.93	131.43	9	2	1	6	9	20	20.73
1033	2	65.3151	62	100	326.79	165.36	61.07	161.07	0	96.43	199.29	283.21	146.79	1	0	1	0	8	28	32.55	28.5	100	472.14	448.57	3.57	70.71	48.93	139.29	75.71	73.57	107.5	1	1	0	0	7	26	26.02
1034	2	63.726	46	50	527.86	174.29	0	39.29	111.07	104.64	59.64	126.79	296.43	16	3	5	8	7	15	19.98	46	50	590.71	255.36	88.93	30.36	87.14	98.21	147.86	82.86	58.57	3	0	0	3	8	21	22.35
1036	2	64.3616	62	100	428.21	121.43	42.86	32.5	97.85	87.86	177.86	128.57	322.86	3	0	0	3	10	28	29.31	17.5	100	432.14	306.79	21.43	23.93	110.36	85.36	371.43	57.5	31.07	2	0	0	2	10	29	27.03
1037	1	67.6767	148	100	483.21	198.93	0	100.36	27.5	150.71	72.86	215.36	191.07	3	1	1	1	6	22	25.03	62	100	531.43	269.05	0	158.1	10.71	137.86	197.38	135.48	0	2	2	0	0	7	21	25.03
1038	1	54.8329	116	0	456.07	111.79	68.57	50	167.5	73.93	92.86	138.93	280.36	10	1	1	8	7	23	24.11	46	0	477.62	200	63.1	11.9	165.24	103.57	124.52	150	144.04	7	1	2	4	6	22	22.35
1039	1	60.8137	116	100	467.86	138.21	0	108.21	111.43	123.57	91.07	178.21	221.43	0	0	0	0	8	25	29.31	62	100	462.14	155	0	17.86	91.79	121.79	260.71	330.71	0	0	0	0	0	8	28	27.03
1040	1	63.0027	116	100	486.79	263.21	1.79	105.71	110.36	80	116.79	82.14	191.43	11	2	1	8	9	22	26	82.5	100	496.9	311.43	0	84.52	25.71	142.38	205.48	113.57	60	1	0	0	1	9	20	25.03
1041	2	66.7397	82.5	100	457.14	174.64	0	78.21	152.5	152.5	214.29	75.36	135.35	2	0	1	1	8	26	18.59	62	100	532.14	320	0	169.64	98.93	132.5	112.86	73.93	0	0	0	0	0	9	29	26.02
1043	2	67.7288	116	100	437.14	167.14	0	48.57	106.79	83.21	32.86	158.21	406.07	6	2	1	3	9	19	25.03	62	100	490	181.07	37.86	58.93	38.57	90.71	101.43	167.86	273.57	2	0	2	0	9	21	26.02
1044	2	64.2411	28.5	100	576.43	192.14	0	49.29	10.71	190.36	135	164.64	121.43	5	2	0	3	8	24	26	38.5	100	495.36	136.07	0	71.79	100.71	189.29	288.57	145.71	12.5	6	1	1	4	8	26	19.98
1045	1	60.8027	148	100	474.64	53.57	52.14	30.71	95	100	165.36	207.86	260.71	5	0	1	4	9	28	22.35	62	100	529.76	60	120	22.38	224.53	124.29	124.76	96.43	137.85	0	0	0	0	9	27	25.03
1046	2	66.9534	62	100	374.64	143.21	13.93	183.93	119.28	120	196.43	127.5	161.07	13	4	0	9	7	21	24.11	38.5	100	455	198.57	0	119.29	85.36	173.21	184.29	204.29	20	6	1	0	5	8	29	27.03
1047	2	50.1151	22.5	0	476.43	216.07	0	161.43	36.07	111.43	165	87.5	186.07	16	6	3	7	6	20	19.98	28.5	0	522.14	285.71	19.64	120.71	44.64	170	125.36	113.93	37.86	18	4	6	8	8	21	22.35
1048	2	62.5863	62	100	504.76	117.62	0	25.48	125.71	126.9	221.43	114.29	203.81	22	8	5	9	8	16	19.25	7.5	100	516.19	221.19	13.1	33.81	169.76	140.24	125.71	57.62	162.38	17	5	6	6	5	18	17.98
1049	2	65.9699	62	75	435	201.79	11.07	58.21	37.86	123.93	271.07	183.21	117.86	8	0	3	5	9	24	25.03	22.5	75	489.64	333.57	0	58.57	50.71	115.71	166.79	115	110	2	1	1	0	9	27	30.7
1051	1	65.3123	116	100	475	143.57	0	116.79	29.28	74.29	199.28	141.43	260.36	0	0	0	0	10	30	35	46	100	560.95	271.67	0	172.62	44.05	64.52	156.91	84.29	85	0	0	0	0	10	30	35
1052	1	61.0438	116	100	508.93	88.57	0	124.64	187.5	111.43	191.79	103.93	123.22	6	4	0	2	4	20	19.98	62	100	509.29	158.21	0	333.57	161.79	110.36	74.64	79.64	12.5	3	0	0	3	5	26	22.35
1053	2	62.4849	82.5	100	465.36	161.79	16.43	30.36	30.36	85.36	146.07	166.79	337.5	4	0	0	4	9	23	28.13	38.5	100	500.36	265.71	5.36	89.64	43.93	160.71	106.43	202.86	65	0	0	0	0	10	28	29.31
1054	2	64.8301	33.5	75	427.86	276.19	0	43.81	79.76	115.24	241.67	244.52	10.95	10	2	3	5	7	25	22.35	28.5	75	448.21	138.93	0	70	132.14	98.21	215.36	155.71	181.43	12	5	3	4	6	20	18.59
1055	1	55.3836	148	100	524.29	66.19	25	0	137.38	151.67	107.14	135	293.33	4	1	1	2	9	30	24.11	62	100	488.81	115	20.24	3.57	35.72	125	158.33	182.38	310.95	7	1	1	5	9	28	24.11
1056	1	65.989	62	100	469.64	208.93	0	65.71	109.64	100	106.07	215.71	164.29	3	0	1	2	10	29	26.02	46	100	607.5	108.57	14.29	87.14	250.71	89.64	120.71	61.43	100	1	0	1	0	10	27	28.13
1057	2	64.6767	148	100	492.5	167.86	45.71	87.86	62.86	83.57	161.07	122.5	216.07	4	0	0	4	9	26	27.03	62	100	566.07	278.21	42.86	76.79	84.28	115.36	108.93	137.14	30.36	4	1	0	3	9	29	27.03
1058	2	67.6329	22.5	100	394.76	198.81	0	105	147.61	144.76	246.9	159.29	42.86	4	2	0	2	8	27	24.11	33.5	100	546.9	295.95	0	58.1	255	106.67	123.81	36.9	16.67	1	0	0	1	8	28	26.02
1059	1	68.0795	116	100	499.52	37.62	0	54.76	14.29	134.05	339.05	239.29	121.43	0	0	0	0	9	30	30.7	33.5	100	530	245.24	25.48	9.52	117.38	165	178.1	84.29	85	0	0	0	0	9	30	29.31
1060	1	60.0219	116	100	473.81	36.19	34.52	37.14	38.81	111.9	207.62	234.52	265.47	8	5	2	1	7	24	21.54	62	100	495.48	214.29	0	129.29	202.62	157.86	22.62	35.24	182.62	3	1	1	1	9	23	24.11
1061	1	60.1644	116	100	560.48	59.05	8.33	114.52	163.57	76.9	116.43	127.62	213.09	8	2	2	4	8	25	25.03	62	100	609.76	140	0	134.52	205.71	107.86	34.29	42.86	165	9	1	2	6	9	29	25.03
1062	2	62.5233	62	100	411.43	220	0	76.43	126.07	102.5	133.21	165.71	204.64	14	1	3	10	8	20	22.35	33.5	100	431.43	100.71	182.14	100.36	113.57	162.14	177.14	98.57	73.93	3	2	0	1	6	16	25.03
1063	1	59.6849	148	100	423.93	113.21	105.36	163.93	123.93	73.21	158.21	137.14	141.07	8	3	0	5	9	28	25.03	116	100	469.29	210.36	211.79	111.43	116.79	113.93	95.71	110.71	0	4	1	0	3	9	28	30.7
1064	1	58.8932	62	100	460.24	82.86	0	38.81	194.05	78.33	117.86	110.95	356.9	5	0	1	4	8	29	26	62	100	523.57	180.48	0	60.48	169.05	156.19	142.14	131.67	76.43	2	0	0	2	9	25	23.21
1065	2	57.6959	82.5	75	507.86	225.48	0	35.95	123.57	77.62	199.29	64.29	205.95	5	1	1	3	8	29	27.03	82.5	75	520.95	195.95	0	110.24	117.86	117.38	166.9	104.76	105.95	6	1	1	4	9	30	32.55
1066	2	61.0932	46	100	440.71	203.93	12.86	79.29	62.15	101.07	159.29	118.93	261.78	1	0	1	0	9	28	24.11	28.5	100	478.93	283.93	0	142.86	109.28	118.93	91.79	69.64	144.65	1	0	1	0	9	30	27.03
1067	2	67.5452	46	100	400.71	213.93	16.07	138.21	58.93	122.86	177.14	77.14	235	4	0	1	3	8	26	28.13	46	100	326.07	237.86	0	195	179.28	180	239.64	57.5	24.65	1	0	0	1	9	24	30.7
1068	1	63.6356	62	100	481.79	127.14	21.07	66.79	114.29	110.71	116.43	109.64	292.14	0	0	0	0	8	26	25.03	148	100	498.57	187.86	35	95.36	120	150.36	57.14	114.29	181.43	1	0	1	0	9	26	28.13
1069	2	62.3644	28.5	50	561.67	290.71	28.57	25	137.38	88.81	47.62	70.24	190	6	1	2	3	5	19	26	7.5	50	593.33	145.95	0	41.67	138.09	99.52	198.81	77.38	145.24	5	1	1	3	8	17	22.35
1071	1	62.2219	148	100	432.5	42.5	7.5	136.43	30	88.93	185.36	77.14	439.65	2	0	0	2	8	24	28.13	116	100	479.29	178.57	35.71	287.14	10.71	121.43	152.5	74.64	100	1	0	1	0	9	24	25.03
1072	2	60.0986	62	100	473.57	229.29	0	60	115.95	155.24	59.52	134.52	211.9	10	3	2	5	8	24	25.03	28.5	100	557.14	344.05	71.43	100.95	169.29	100.48	38.1	37.14	21.43	6	2	0	4	9	24	25.03
1073	2	64.1699	33.5	100	457.86	74.64	0	54.29	141.07	85.71	192.14	98.57	335.72	9	2	0	7	9	23	28.13	22.5	100	530.36	185	0	45.36	223.93	120	181.43	77.86	76.07	4	1	0	3	9	30	27.03
1074	2	65.1836	62	100	508.1	138.1	0	22.86	193.57	113.57	108.33	123.33	232.15	0	0	0	0	8	27	35	22.5	100	521.19	146.43	0	35.95	276.19	135.24	157.14	110.71	57.14	0	0	0	0	9	25	29.31
1075	2	57.2466	148	100	479.76	134.29	0	24.29	142.14	156.67	177.38	78.81	246.67	2	0	1	1	6	19	27.03	148	100	370.71	219.52	0	207.86	253.81	158.33	104.05	97.62	28.1	12	6	0	6	4	23	25.03
1076	1	55.1068	82.5	100	498.21	205	5	15.71	29.28	126.79	123.58	91.79	344.64	1	0	0	1	9	30	32.55	62	100	513.57	127.86	19.64	108.57	42.85	186.79	281.07	100.36	59.29	0	0	0	0	9	30	35
1077	2	59.3452	148	100	484.29	170.48	0	110.95	106.43	150	27.14	204.52	186.19	14	4	1	9	6	17	19.25	62	100	486.79	270.71	5.36	121.43	72.14	113.57	90	201.43	78.57	3	0	1	2	8	21	25.03
1078	2	61.7123	82.5	100	385.71	231.43	4.29	221.43	23.57	88.21	67.86	140	277.5	1	0	0	1	9	30	28.13	62	100	441.43	471.79	8.57	157.14	45.71	93.93	142.86	27.86	50.72	0	0	0	0	9	26	35
1079	2	61.5041	38.5	100	495.24	144.05	9.52	46.9	283.09	144.29	45.24	52.38	219.29	19	6	5	8	6	20	19.98	17.5	100	522.14	173.81	15.95	70	377.85	112.38	61.43	46.43	60	8	1	1	6	8	24	24.11
1081	2	65.0247	46	0	450	347.5	0	38.75	91.25	83.75	183.75	170	75	0	0	0	0	9	28	30.7	22.5	0	613.75	255	0	60	198.75	75	223.75	3.75	10	0	0	0	0	9	30	29.31
1082	2	66.2027	62	0	427.14	142.86	14.29	109.76	131.9	104.52	130.95	125	253.57	15	7	3	5	4	19	22.35	17.5	0	505.48	234.29	25	84.05	244.04	157.14	85.24	85.71	19.05	5	1	2	2	7	20	23.21
1083	2	62.6685	82.5	100	525.71	172.62	0	107.62	95	109.76	181.9	120	127.38	8	0	2	6	8	30	30.7	28.5	100	486.19	138.57	0	45.48	68.1	131.67	201.9	104.05	264.05	0	0	0	0	10	28	35
1084	2	56.0027	82.5	25	526.79	172.14	0	36.07	185.71	49.64	57.86	96.07	315.72	7	1	2	4	8	17	21.54	82.5	25	490	184.29	0	143.21	227.15	86.43	85.36	113.93	109.64	9	1	1	7	8	17	22.35
1085	2	65.4274	62	100	536.43	213.57	4.29	41.43	63.93	71.07	267.14	158.21	83.93	9	5	0	4	4	10	20.73	46	100	463.57	327.86	0	84.64	67.14	100.71	181.43	214.64	0	3	1	0	2	8	28	29.31
1086	1	70.0137	62	75	462.86	203.57	0	135	186.43	77.14	86.79	138.21	150	8	3	4	1	8	24	25.03	28.5	75	507.14	355	0	113.93	113.21	121.07	47.86	181.79	0	3	2	1	0	8	25	25.03
1087	2	62.6082	22.5	0	466.79	167.14	69.64	50	65.72	175	9.64	182.5	253.57	16	2	5	9	8	26	25.03	17.5	0	479.29	170.71	7.14	38.21	139.29	199.64	130.35	128.93	146.42	43	11	12	20	6	9	15.32
1088	2	66.1507	62	100	469.64	112.5	0	77.86	51.79	183.21	183.21	120.71	241.07	15	5	0	10	8	24	26	46	100	448.21	230.71	0	27.86	46.43	250.71	245	123.21	67.86	8	0	1	7	9	26	24.11
1089	1	78.6027	46	25	483.93	261.43	0	101.79	79.29	180.71	244.65	36.07	52.14	9	1	1	7	8	16	26	38.5	25	533.93	214.64	14.29	75	156.43	173.21	154.64	50	67.86	10	1	1	8	8	17	20.73
2002	2	65.6137	46	50	520.36	318.57	0	112.86	182.15	138.93	63.57	56.07	47.5	1	0	0	1	8	20	25.03	38.5	50	485.48	243.1	0	54.05	210.48	137.62	102.38	60	146.9	0	0	0	0	7	21	25.03
2006	1	55.7808	82.5	25	416.43	153.93	0	58.93	113.93	138.57	229.29	124.64	204.28	16	4	5	7	7	20	21.54	7.5	25	541.07	322.14	0	89.29	338.57	93.21	40.71	10.71	4.29	10	1	2	7	7	25	25.03
2011	1	58.6055	116	100	482.86	118.21	0	13.57	205.36	137.86	73.93	252.86	155.36	3	1	0	2	8	27	26.02	82.5	100	395	354.29	0	115.36	308.93	160.36	42.86	47.14	16.07	0	0	0	0	9	27	35
2016	1	64.2082	148	100	477.14	211.07	7.14	127.14	22.5	79.29	214.29	151.07	150.36	4	2	2	0	9	19	26.02	7.5	100	511.19	190.24	0	37.62	0	127.14	335.48	128.33	110	1	0	0	1	9	21	23.21
2017	2	65.0904	7.5	75	504.05	459.29	0	56.67	221.43	108.33	41.43	36.9	11.9	8	2	0	6	3	16	19.98	7.5	75	531.9	285.24	13.1	54.05	153.09	99.52	114.76	147.86	40.48	11	5	0	6	4	21	21.54
2018	2	59.2493	148	100	516.9	230	0	74.29	176.43	135.48	96.43	89.05	121.43	6	2	0	4	8	30	25.03	82.5	100	544.64	206.43	49.64	37.14	243.93	139.64	95	77.5	46.07	0	0	0	0	8	25	27.03
2020	2	65.0137	116	100	473.33	178.33	13.1	88.81	104.05	139.52	65	98.57	279.28	5	0	1	4	9	25	22.35	82.5	100	432.14	273.57	4.29	91.79	69.64	141.07	103.57	103.57	220.36	3	0	0	3	9	25	25.03
2022	1	64.7644	46	100	441.67	69.76	0	39.76	150	123.81	79.29	127.86	407.86	4	2	1	1	9	27	29.31	17.5	100	418.93	200.36	0	0	106.78	112.86	79.29	125.36	396.43	1	0	0	1	9	30	28.13
2023	2	62.0055	82.5	25	397.5	212.5	16.43	159.64	121.07	145.71	42.5	90.36	254.29	16	9	0	7	8	16	19.25	46	25	426.9	193.81	10	147.38	82.14	105.71	158.1	158.57	157.38	22	8	6	8	6	12	21.54
2025	2	62.0329	82.5	100	432.86	245.71	8.57	52.86	70.36	126.43	194.29	94.29	214.64	3	1	2	0	6	16	19.98	62	100	544.76	286.19	0	106.43	109.77	144.05	60.48	105.95	82.38	4	3	1	0	5	20	24.11
2026	1	63.0712	82.5	100	488.93	126.43	145.36	70	143.22	132.14	128.57	104.64	100.71	14	8	0	6	6	18	19.98	62	100	504.05	132.62	133.33	65.71	158.1	150.48	61.43	150.71	83.57	10	4	0	6	6	20	24.11
2027	2	58.9808	116	100	456.79	118.57	38.57	53.57	203.93	110.71	163.93	99.64	194.29	1	0	1	0	8	27	30.7	62	100	471.07	201.79	23.21	81.07	274.29	61.07	72.86	160.36	94.28	1	0	1	0	9	30	32.55
2028	1	62.5562	148	100	354.76	117.38	0	11.9	464.28	79.52	42.38	94.76	275	1	1	0	0	9	30	32.55	38.5	100	368.81	113.57	0	60.24	694.29	81.19	14.52	99.05	8.33	4	2	0	2	9	30	25.03
2030	2	61.5671	82.5	0	363.93	293.93	70	66.07	66.79	105.71	191.79	122.14	159.64	3	2	1	0	8	30	27.03	38.5	0	386.67	245.24	67.62	30.48	191.19	113.1	48.81	95.24	261.67	2	1	1	0	9	30	35
2032	1	60.326	148	75	422.5	141.07	0	85.71	113.93	140.36	42.86	127.5	366.07	28	8	3	17	7	19	20.73	82.5	75	507.5	38.93	226.43	138.93	229.28	80.36	93.57	85.71	39.29	2	0	0	2	8	20	25.03
2034	2	58.2603	82.5	100	423.81	71.67	24.52	108.33	31.67	130.95	133.1	219.52	296.43	10	2	3	5	7	28	21.54	33.5	100	532.62	123.1	58.81	89.05	125.48	155.48	121.67	167.86	65.95	10	2	2	6	8	19	24.11
2035	1	58.8877	116	100	537.14	171.43	0	118.93	127.85	120.71	52.14	205	106.79	1	0	0	1	10	30	35	82.5	100	517.14	191.79	0	104.64	258.22	127.5	117.5	68.57	54.64	0	0	0	0	10	30	35
2039	1	68.3014	148	0	518.93	174.64	32.14	0	80.71	163.93	78.93	197.86	192.86	0	0	0	0	8	23	24.11	116	0	592.38	135.95	0	92.86	90.95	146.9	99.05	106.43	175.48	0	0	0	0	9	29	25.03
2040	1	62.1589	116	100	517.86	101.07	13.21	162.14	36.43	93.57	180	140.36	195.35	0	0	0	0	8	30	30.7	46	100	581.43	183.93	37.86	94.64	94.65	114.64	98.57	88.57	145.71	0	0	0	0	10	30	35
2041	2	65.0658	22.5	100	411.43	235.95	0	120	99.05	120.71	277.62	80	95.24	6	4	0	2	7	26	19.98	28.5	100	506.79	276.79	0	9.29	187.14	116.07	18.21	102.14	223.57	1	0	1	0	9	27	27.03
2042	1	60.3562	116	100	380.36	82.86	65.36	2.14	260.72	101.79	77.5	126.07	343.21	4	1	1	2	8	24	28.13	62	100	372.5	128.57	62.5	112.5	242.5	116.07	28.93	110	266.43	4	1	1	2	9	30	28.13
2043	1	61.8986	46	100	515.24	136.19	0	35.71	164.52	95.71	73.81	109.29	309.52	9	0	0	9	9	30	27.03	22.5	100	646.43	173.21	0	0	88.57	137.14	28.57	104.64	261.43	0	0	0	0	9	30	35
2044	1	63.726	116	100	441.9	133.81	0	14.29	265.47	105.24	130.24	122.14	226.91	14	8	1	5	9	15	18.59	116	100	432.86	219.29	0	67.86	179.64	158.93	183.21	187.5	10.71	28	13	2	13	7	17	16.36
2045	1	57.0301	148	100	501.79	71.43	0	28.93	117.5	142.5	77.86	178.57	321.42	16	8	3	5	7	18	21.54	62	100	580	120.71	0	151.43	161.43	142.5	37.5	40.71	205.72	9	5	0	4	7	18	23.21
2046	1	56.0137	148	100	382.5	124.29	0	118.57	92.5	107.5	198.57	111.79	304.28	15	4	1	10	7	27	19.25	82.5	100	532.86	315.71	0	105	107.5	171.07	81.43	35.71	90.71	1	1	0	0	8	30	23.21
2047	1	68.0247	148	100	408.57	188.57	10	127.14	67.85	151.79	129.64	101.07	255.36	4	0	0	4	8	29	30.7	62	100	365	307.62	0	108.57	78.57	133.81	158.33	99.05	189.05	0	0	0	0	10	28	32.55
2048	1	62.0192	148	100	447.62	162.38	0	80.24	144.52	89.76	22.38	217.86	275.24	1	0	0	1	9	27	32.55	148	100	455.36	191.43	0	71.79	176.07	117.86	90	166.79	170.72	4	0	0	4	8	30	32.55
2050	2	64.5425	82.5	100	476.67	86.67	33.33	76.67	37.38	90.95	175	142.38	320.95	3	0	0	3	8	29	26.02	62	100	445.36	270.36	37.5	100.36	60	106.07	100	126.43	193.92	6	0	1	5	9	26	29.31
2051	1	59.7096	148	100	382.14	86.67	28.57	61.67	148.81	128.81	167.62	146.43	289.28	5	2	1	2	9	29	25.03	148	100	531.19	179.52	21.43	51.43	85.48	170.71	168.1	128.33	103.81	0	0	0	0	9	30	32.55
2052	2	54.8384	148	100	473.21	127.5	0	55.36	98.22	115	130.36	168.21	272.14	7	1	0	6	8	19	26	148	100	581.07	94.29	21.43	61.43	152.14	105.36	181.08	187.5	55.72	0	0	0	0	9	26	25.03
2053	1	68.5616	116	100	408.93	264.29	48.57	36.07	94.64	112.5	143.57	79.29	252.14	5	1	1	3	8	25	26.02	62	100	435.24	312.86	52.14	46.43	127.38	175.95	72.14	118.57	99.28	2	0	1	1	8	26	25.03
	1=Male
